# Supplementary material
Source: Springer Nature journal article supplement (https://www.springermedizin.de/resource/supplementary/12889_2012_4256_MOESM1_ESM.pdf/9492094)
Supplement: MOESM1 [file 9492094]

**1. Recruit**

**2. Advocate for evidence-based policies across sectors to reduce obesity**

**3. Analyse capacity, support for evidence-informed policy making**

- Doc. review
- Interviews with:
  - Experts
  - Participants

**4. Workshops**

- Policy
- Evidence use:
  - Access
  - Analyse
  - Adapt
  - Apply

**5. Facilitate development of evidence-informed policy documents**

**6. Embed evidence-informed policy making structures and processes**

**7. Evaluate effect of a knowledge broking approach**

**Advocate and build relationships with and between participating organisations**

**Activities with participants: 15-18 months**

**Embedding activities with organisations**
